# Supplementary material
Source: publisher figshare collection journal article supplement (https://acs.figshare.com/ndownloader/files/5183392)
Supplement: Supplementary file 1 [file 5183392]

# The platinum catalyzed selective hydration of hindered nitriles and nitriles with acid or base sensitive groups

Xiao-bin Jiang,<sup>a</sup> Adriaan J. Minnaard,<sup>a\*</sup> Ben L. Feringa,<sup>a\*</sup> and Johannes G. de Vries<sup>a, b\*</sup>

- a. Department of Organic and Molecular Inorganic Chemistry, Stratingh Institute, University of Groningen, Nijenborgh 4, 9747AG Groningen, The Netherlands.
- b. DSM Pharma Chemicals, Advanced Synthesis & Catalysis, P. O. Box 18, 6160 MD Geleen, The Netherlands.

[Hans-JG.Vries-de@dsm.com](mailto:Hans-JG.Vries-de@dsm.com)

## Supporting information

### Table of contents

|                                                                                                |        |
|------------------------------------------------------------------------------------------------|--------|
| 1. General methods                                                                             | s2     |
| 2. The synthetic procedure for nitrile <b>4d</b> , <b>4e</b>                                   | s2-3   |
| 3. Copies of <sup>1</sup> H, <sup>13</sup> C, Mass, 2D COSY, NOESY spectrum of amide <b>5j</b> | s4-7   |
| 4. Copies of <sup>1</sup> H, <sup>13</sup> C spectrum of amide <b>5a-c</b>                     | s8-10  |
| 5. Selected X-ray data of catalyst <b>2</b>                                                    | s11-13 |

## 1. General methods

$^1\text{H}$  NMR (300 MHz, 500 MHz) and  $^{13}\text{C}$  NMR (121 MHz) spectra were recorded in  $\text{CDCl}_3$ ,  $\text{DMSO-d}_6$  or  $\text{D}_2\text{O}$ . Chemical shifts were recorded in  $\delta$  units (ppm) relative to the residue deuterated solvent signals of  $\text{CHCl}_3$  ( $^1\text{H}$ : 7.25 ppm,  $^{13}\text{C}$ : 77.7 ppm);  $\text{DMSO-d}_6$  ( $^1\text{H}$ : 2.5 ppm,  $^{13}\text{C}$ : 39.5 ppm);  $\text{D}_2\text{O}$  ( $^1\text{H}$ : 4.72 ppm). Coupling constant was recorded by Hertz (Hz). All melting points were taken with a capillary melting point apparatus and were not corrected. Optical rotations were measured on a polarimeter at ambient temperature. Mass spectra were measured on a mass spectrometer using electron impact ionization (EI, 70 eV), chemical ionization (CI) and electro spray. All solvents were analytic grade and were purified according to standard procedures, if necessary. Gas chromatographic analyses were performed on an HP-1 crosslinked methyl silicone capillary column (25 m length x 0.2 mm i.d.) and an FID detector using He as carrier gas. Enantiomeric pure ligands **L1** were separated by preparative HPLC (Daicel, chiralpak AD, Preparative 250 x 20 mm i.d., heptane / 2-propanol 90 / 10, flow 20 ml / min, detecting wave length 254nm).  $\text{PtCl}_2$  was purchased from Strem chemical Inc. and used directly without any further purification. Nitriles **4a-c**, **4f-k** were purchased from Acros chemicals Inc. and used as received unless stated otherwise. Nitriles **4d**, **4e** were prepared using modify of reported procedure.<sup>1</sup>

## 2. The synthetic procedure for nitrile **4d**, **4e**

**2-Methyl-2-phenylpentanenitrile (4d)**<sup>1</sup> A solution of diisopropyl amine (55 mmol, 7.7 ml) in 30 ml of dry THF was cooled to 0 °C and a solution of n-BuLi (1.6 M in hexane, 35 ml, 56 mmol) was added slowly and the mixture kept at 0 °C for 1 h. Hereafter nitrile **4k** (50 mmol, 6.7 ml) in 10 ml of dry THF was added dropwise, followed after 30 min at 0 °C by a solution of allyl bromide (51 mmol, 4.4 ml) in 10 ml THF. The reaction mixture was allowed to warm to RT overnight, diluted with 30 ml of  $\text{H}_2\text{O}$ , extracted with  $\text{Et}_2\text{O}$ , washed with

<sup>1</sup> Woods, G. F.; Heying, T. L.; Schwartzman, L. H.; Grenell, S. M.; Gasser, W. F.; Rowe, E. W.; Bolgiano, N. C. *J. Org. Chem.*

brine and dried over  $\text{MgSO}_4$ . After removal of the solvent a slightly yellow oil was obtained. The crude product was directly hydrogenated with 10% Pd/C and  $\text{H}_2$  (balloon) in 30 ml absolute EtOH, during 24 h at RT. The reaction mixture was filtered and washed with EtOH. After removal of the solvent, yellow-brown oil remained, which was purified by vacuum distillation  $70\text{ }^\circ\text{C}/0.14\text{ Torr}$  (lit.<sup>1</sup>  $135\text{-}145\text{ }^\circ\text{C}/2.3\text{ Torr}$ ). The product was isolated as colorless oil in 86% yield.

$^1\text{H}$  ( $\text{CDCl}_3$ )  $\delta$  0.85 (t,  $J=7.0\text{Hz}$ , 3H), 1.14-1.26 (m, 1H), 1.38-1.52 (m, 1H), 1.66 (s, 3H), 1.75-1.89 (m, 2H), 7.21-7.40 (m, 5H);  $^{13}\text{C}$  ( $\text{CDCl}_3$ )  $\delta$  138.9, 127.3, 126.1, 123.9, 122.1, 42.8, 41.0, 26.2, 17.4, 12.4; HRMS ( $\text{EI}^+$ )  $m/z$  173.1202, calcd for  $\text{C}_{12}\text{H}_{15}\text{N}$  173.1204.

**2-Methyl-2,3-diphenylpropanenitrile (4e)**<sup>2</sup> was prepared from nitrile **4k** and benzyl bromide using a similar procedure as for **4d**, purified by  $\text{SiO}_2$  column, Petroleum Ether/ $\text{Et}_2\text{O}$  2/1 to get a yellow oil, isolated yield 98%.

$^1\text{H}$  ( $\text{CDCl}_3$ )  $\delta$  1.79 (s, 3H), 3.19 (s, 2H), 7.10-7.15 (m, 2H), 7.28-7.40 (m, 3H), 7.41-7.49 (m, 5H);  $^{13}\text{C}$  ( $\text{CDCl}_3$ )  $\delta$  138.3, 133.7, 128.9, 127.4, 126.7, 126.5, 125.9, 124.5, 121.7, 47.0, 42.1, 24.6; HRMS ( $\text{EI}^+$ )  $m/z$  221.1214, calcd for  $\text{C}_{16}\text{H}_{15}\text{N}$  221.1204.

### 3. Copies of $^1\text{H}$ , $^{13}\text{C}$ , Mass, 2D COSY, NOSY spectrum of amide **5j**

---

**1954**, 19, 1290-1295.

<sup>2</sup> (a) Takeda, T.; Ando, K.; Mamada, A.; Fujiwara, T. *Chem. Lett.* **1985**, 1149-1152. (b) Ronald, G.; Mitchell, T. R. B.; Somyote, S.; Ngampong, T. *Tetrahedron Lett.* **1981**, 22, 4107-4110. (c) Bordwell, F. G.; Hughes, D. L. *J. Org. Chem.* **1983**, 48, 2206-2215. (d) Makoza, M.; Stalinski, K. *Tetrahedron* **1998**, 54, 8797-8810.

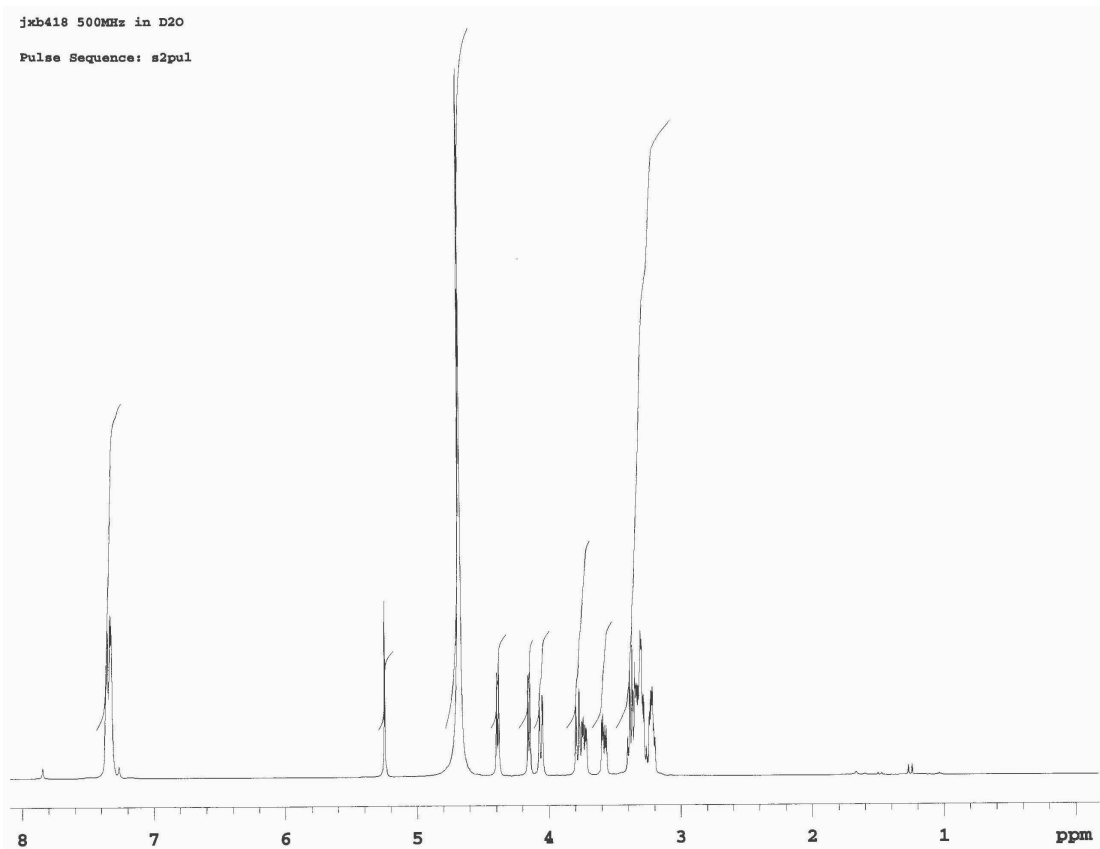

**Figure 1** Copy of  $^1\text{H}$  NMR ( $\text{D}_2\text{O}$ , 500MHz) of amide **5j**

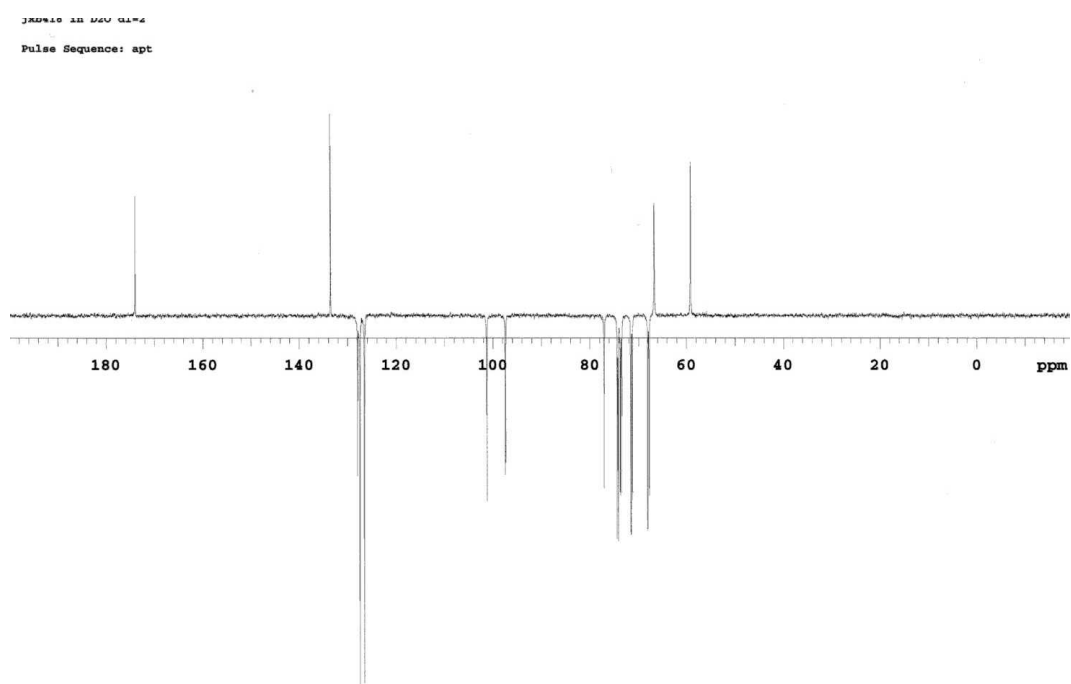

**Figure 2** Copy of  $^{13}\text{C}$  NMR ( $\text{D}_2\text{O}$ ) of amide **5j**

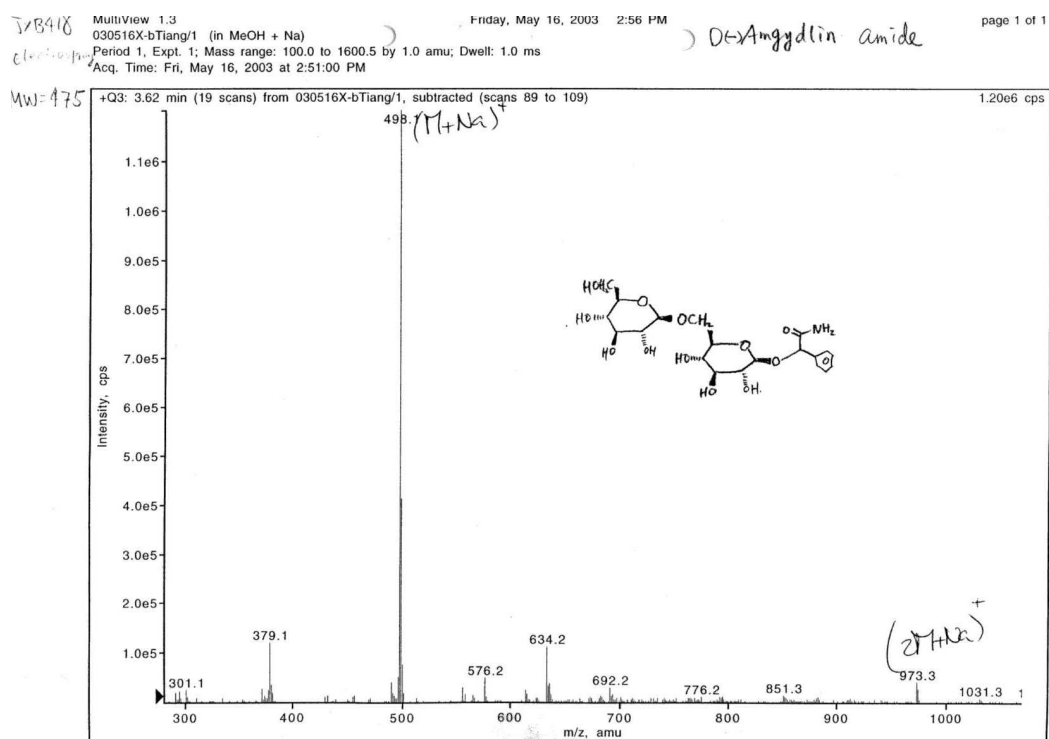

**Figure 3** Copy of Mass spectrum (electro spray) of amide **5j**

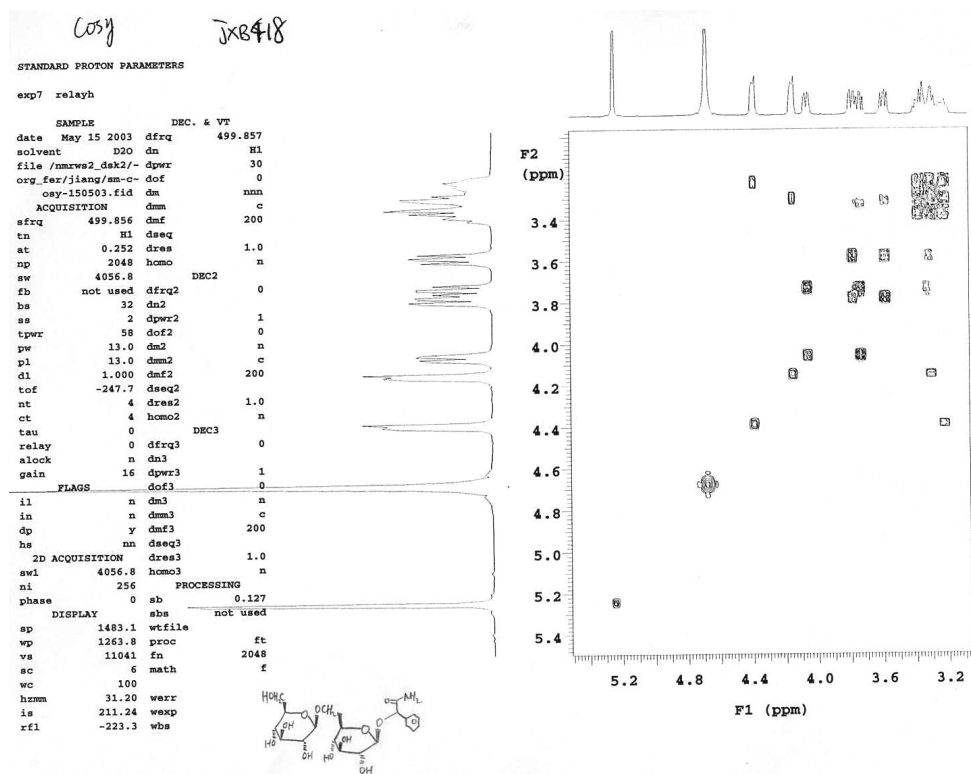

Figure 4 Copy of COSY (D<sub>2</sub>O, 500MHz) NMR of amide 5j

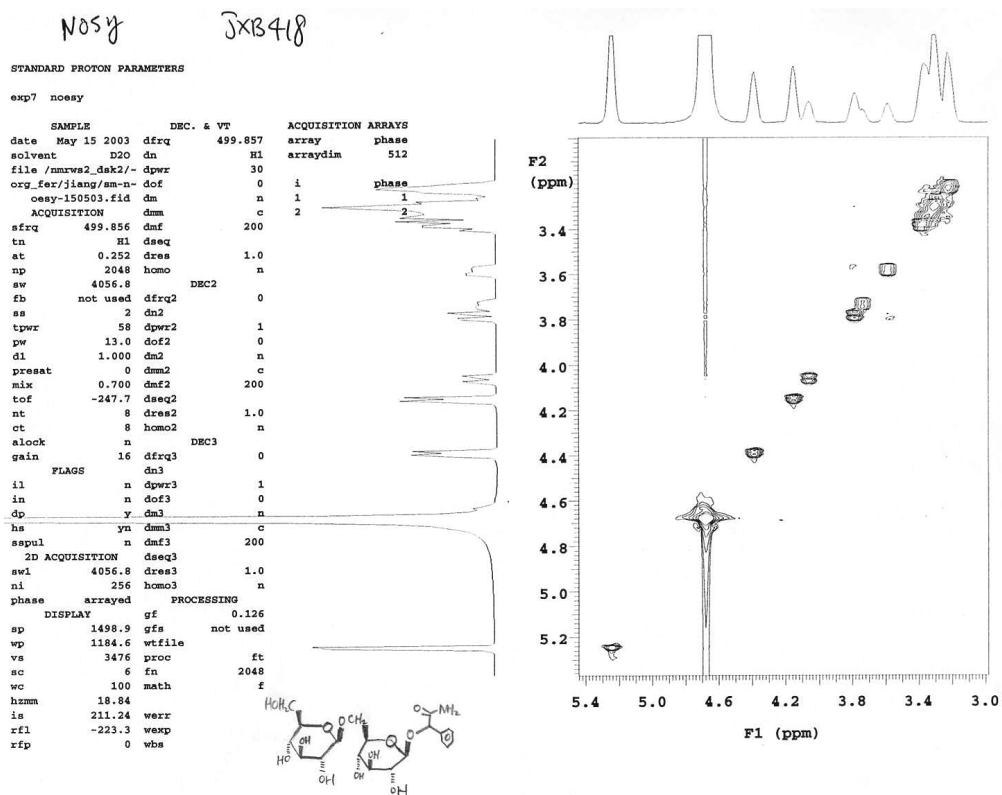

Figure 5 Copy of NOESY (D<sub>2</sub>O, 500MHz) NMR of amide **5j**

#### 4. Copy of <sup>1</sup>H, <sup>13</sup>C NMR of amides **5a-c**

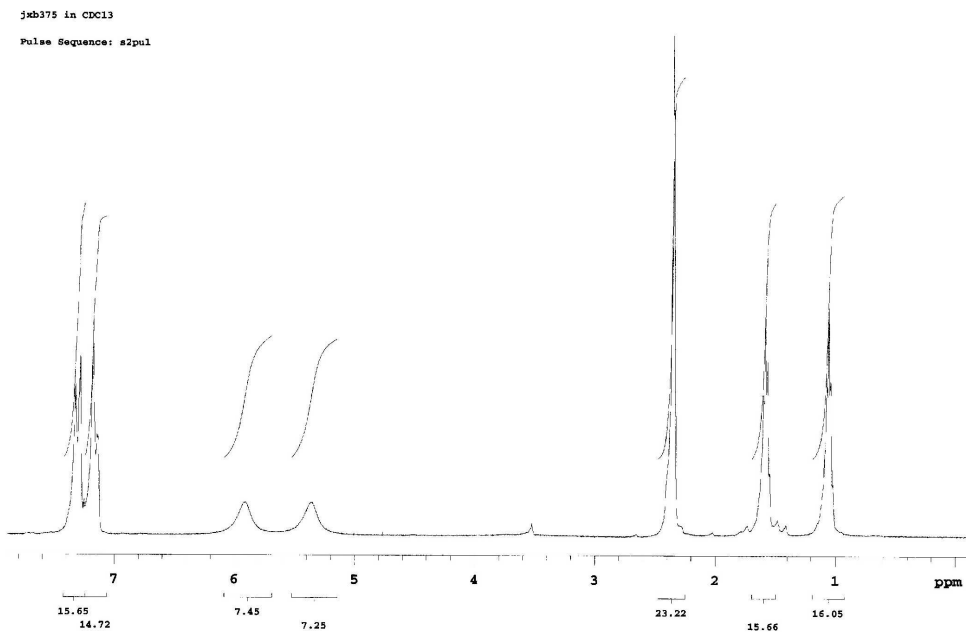

**Figure 6** Copy of <sup>1</sup>H NMR (CDCl<sub>3</sub>) of amide **5a**

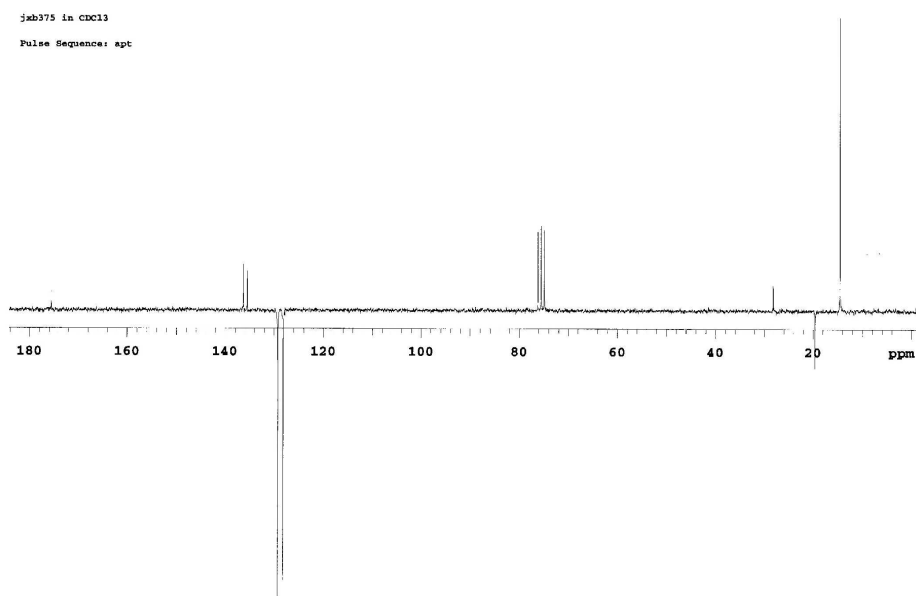

**Figure 7** Copy of <sup>13</sup>C NMR (CDCl<sub>3</sub>) of amide **5a**



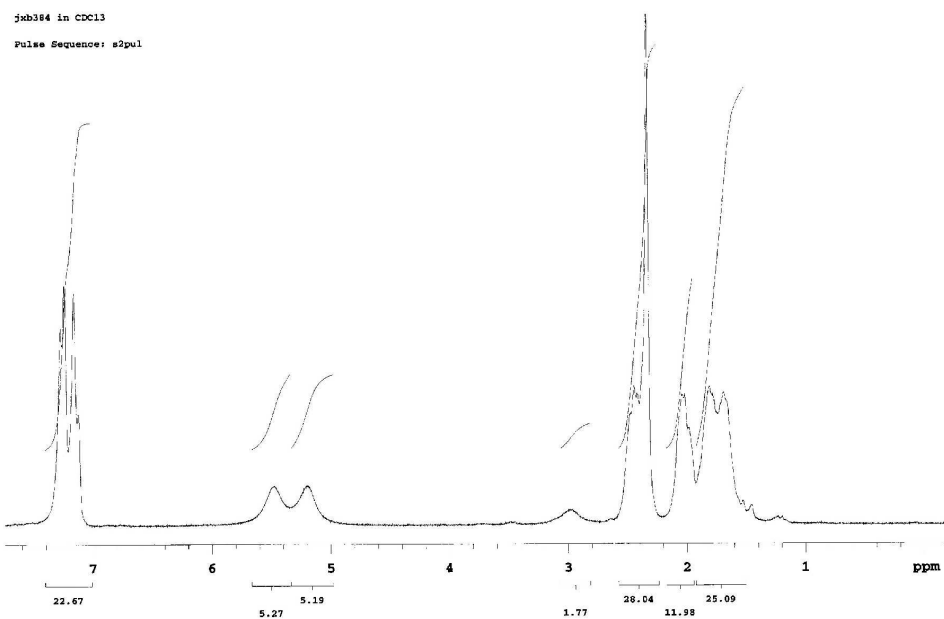

**Figure 8** Copy of  $^1\text{H}$  NMR ( $\text{CDCl}_3$ ) of amide **5b**

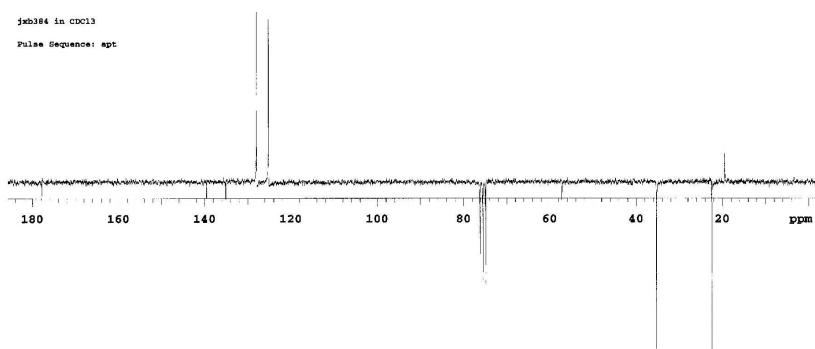

**Figure 9** Copy of  $^{13}\text{C}$  NMR ( $\text{CDCl}_3$ ) of amide **5b**

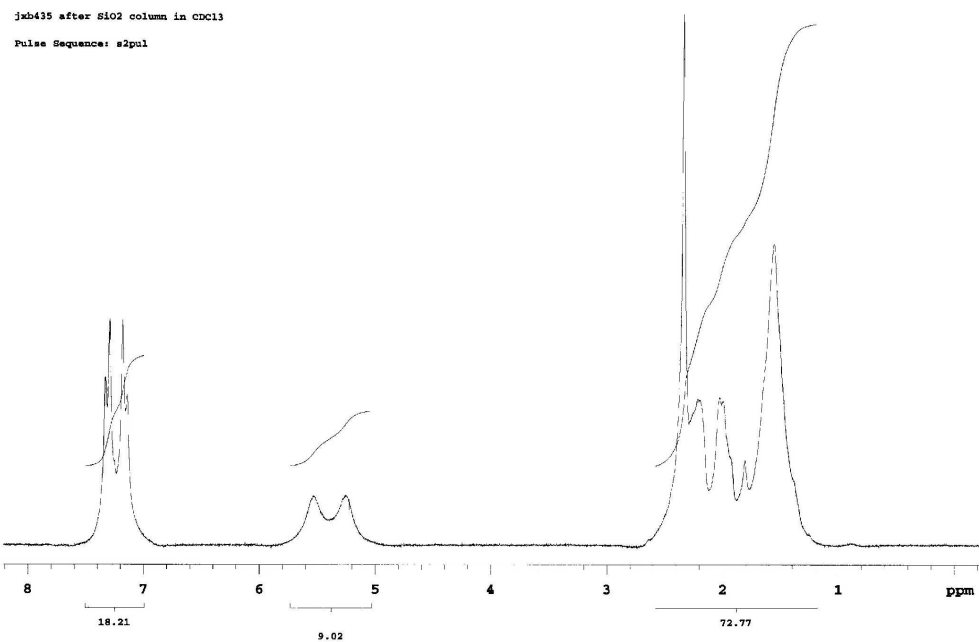

**Figure 10** Copy of  $^1\text{H}$  NMR ( $\text{CDCl}_3$ ) of amide **5c**

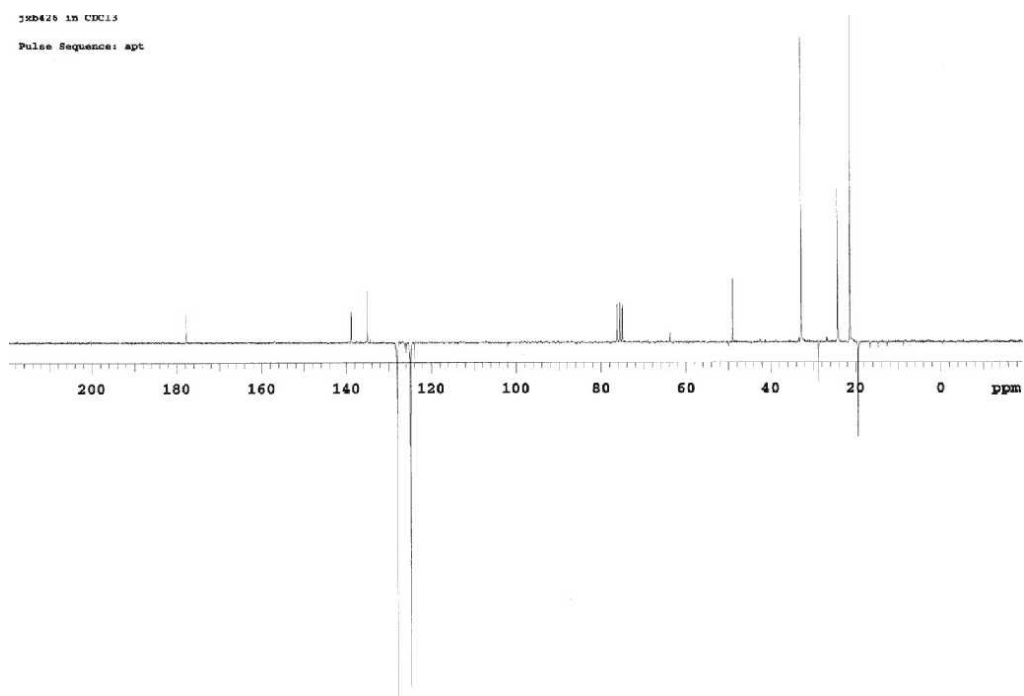

**Figure 12** Copy of  $^{13}\text{C}$  NMR ( $\text{CDCl}_3$ ) of amide **5c**

## 5. Selected X-ray data of catalyst 2

Crystallographic data: colorless needle-shaped crystals,  $\text{C}_6\text{H}_{20}\text{ClO}_3\text{P}_3\text{Pt} \cdot 0.5(\text{H}_2\text{O})$ ; orthorhombic,  $Fdd2$ , cell constants  $a = 30.408(2)$ ,  $b = 32.819(2)$ ,  $c = 6.0421(4) \text{ \AA}$ ,  $V = 6029.8(7) \text{ \AA}^3$ ,  $Z = 16$ ,  $D_x = 2.087 \text{ g cm}^{-3}$ ,  $F(000) = 3616$ ,  $\mu = 97.93 \text{ cm}^{-1}$ ,  $\lambda(\text{MoK}\alpha) = 0.71073 \text{ \AA}$ ; temperature of data collection 293K, 14333 reflections measured,  $\text{GOF} = 0.921$ ,  $wR(F^2) = 0.0368$  for 3994 reflections and 137 parameters, 1 restraints and  $R(F) = 0.0200$  for 3680 reflections obeying  $F_o \geq 4.0 \sigma(F_o)$  criterion of observability.

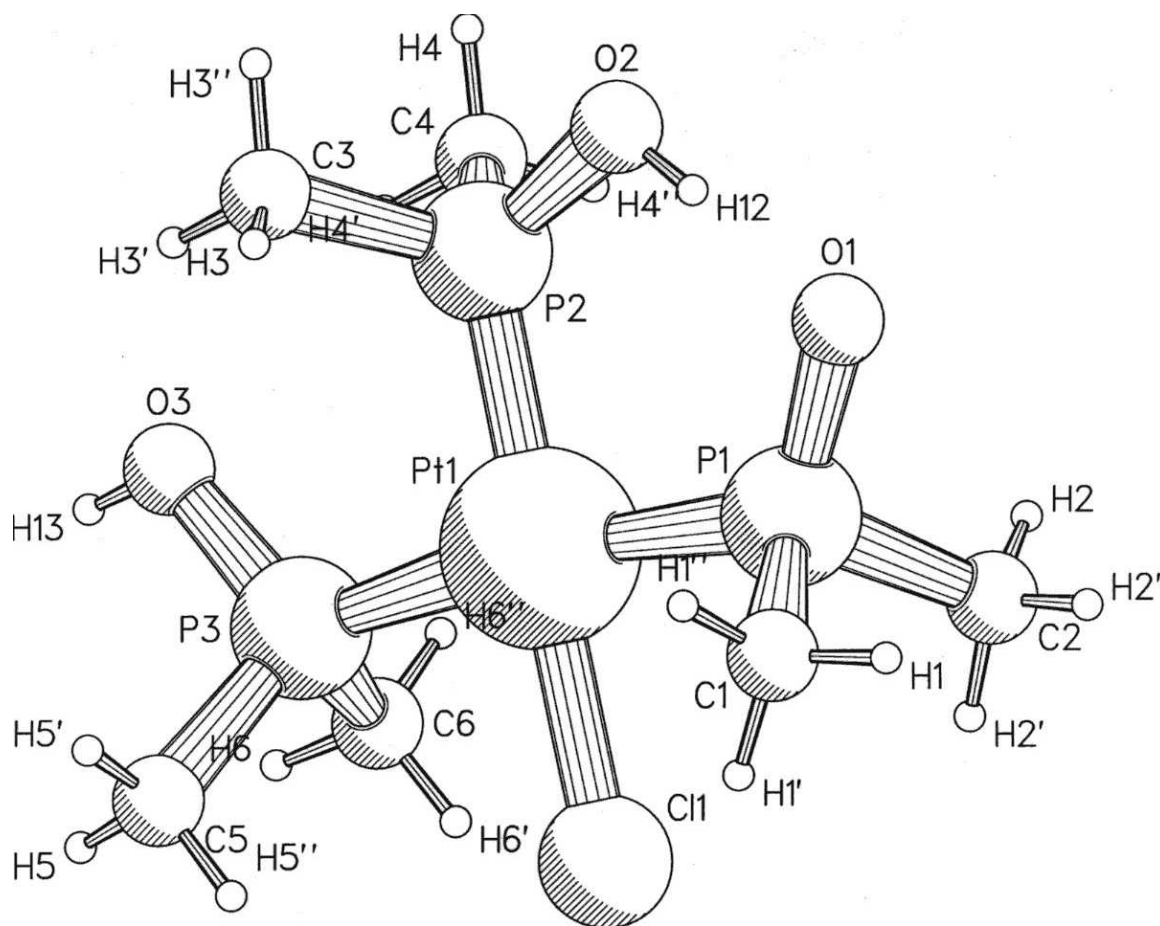

**Figure 13** Perspective PLUTO drawing of catalyst 2

**Table 1** Interatomic distance (Å)

|     |     |            |
|-----|-----|------------|
| Pt1 | Cl1 | 2.2814(10) |
| Pt1 | P1  | 2.3164(10) |
| Pt1 | P2  | 2.2259(10) |
| Pt1 | P3  | 2.3291(10) |
| P1  | O1  | 1.554(3)   |
| P1  | C1  | 1.796(5)   |
| P1  | C2  | 1.797(4)   |
| P2  | O2  | 1.573(3)   |
| P2  | C3  | 1.797(5)   |
| P2  | C4  | 1.797(5)   |
| P3  | O3  | 1.590(4)   |
| P3  | C5  | 1.798(5)   |
| P3  | C6  | 1.790(5)   |

Standard deviations in the last decimal place are given in parentheses.

**Table 2** Bond angles (°)

|     |     |    |            |
|-----|-----|----|------------|
| Cl1 | Pt1 | P1 | 85.89(4)   |
| Cl1 | Pt1 | P2 | 178.98(4)  |
| Cl1 | Pt1 | P3 | 85.06(4)   |
| P1  | Pt1 | P2 | 94.09(4)   |
| P1  | Pt1 | P3 | 170.93(4)  |
| P2  | Pt1 | P3 | 94.95(5)   |
| Pt1 | P1  | O1 | 117.80(12) |
| Pt1 | P1  | C1 | 111.08(15) |
| Pt1 | P1  | C2 | 112.20(14) |
| O1  | P1  | C1 | 105.99(19) |
| O1  | P1  | C2 | 105.4(2)   |
| C1  | P1  | C2 | 103.2(2)   |
| Pt1 | P2  | O2 | 116.07(12) |
| Pt1 | P2  | C3 | 113.83(17) |
| Pt1 | P2  | C4 | 113.07(16) |
| O2  | P2  | C3 | 103.6(2)   |
| O2  | P2  | C4 | 104.20(19) |
| C3  | P2  | C4 | 104.9(2)   |
| Pt1 | P3  | O3 | 115.89(13) |
| Pt1 | P3  | C5 | 113.49(16) |
| Pt1 | P3  | C6 | 111.74(16) |
| O3  | P3  | C5 | 104.7(2)   |
| O3  | P3  | C6 | 106.0(2)   |
| C5  | P3  | C6 | 104.0(3)   |

Standard deviations in the last decimal place are given in parentheses.

**Table 3** Geometry of intra- and intermolecular hydrogen bonds (Å, °) with *s.u.*'s in parentheses

| D-H...A     | [ARU-code]  | D-H (Å) | H...A (Å) | D...A (Å) | D-H...A (°) |
|-------------|-------------|---------|-----------|-----------|-------------|
| O2-H12...O1 | [        ]  | 0.82    | 1.63      | 2.446(4)  | 178         |
| O3-H13...O1 | [ 8455.01 ] | 0.82    | 1.78      | 2.593(4)  | 169         |

Note: ARU codes in [ ] are with reference to the Coordinates printed above

Translation of ARU-code to Equivalent Position Code: [ 8455. ] = -1/4+x,-1/40-y,3/4+z
